# Supplementary material
Source: publisher site journal article supplement (https://www.spandidos-publications.com/4773/downloadSupplementary)
Supplement: Supplementary file 1 [file downloadSupplementary]

Table SI. Stage-specific associations between age and gender.

| Cancer stage  | Age group | Female | Male | P-value |
|---------------|-----------|--------|------|---------|
| Stage I, II   | <70 years | 11     | 19   | 0.001   |
|               | ≥70 years | 15     | 2    |         |
| Stage III, IV | <70 years | 6      | 10   | 0.289   |
|               | ≥70 years | 9      | 6    |         |
